# Supplementary material for: Relationship between swimming speed, intra-cycle variation of horizontal speed, and Froude efficiency during consecutive stroke cycles in adolescent swimmers
Source: PeerJ. 2023 Oct 9;11:e16019. doi: 10.7717/peerj.16019 (PMC10569166; doi:10.7717/peerj.16019)
Supplement: Supplemental Information 1 [file peerj-11-16019-s001.xlsx]

## Sheet: Folha1
Sex	Age	Bodymass (kg)	Height (m)	Arm Span (m)	FINApoints	dv_1 (%)	dv_2 (%)	dv_3 (%)	Speed 1 (m/s)	Speed 2 (m/s)	Speed 3 (m/s)	nF_1 (%)	nF2 (%)	nF3 (%)
Male	15	63	1.76	1.85	634	6.53	7.42	6.6	1.62	1.58	1.64	30.1	32.18	35.32
Male	15.8	63.5	1.69	1.71	605	6.83	3.19	5.84	1.7	1.73	1.74	34.6	32.16	30.19
Male	15.76	61.4	1.73	1.74	526	6.05	7.33	5.38	1.55	1.64	1.57	35.74	35.32	30.36
Male	15.56	61.3	1.75	1.8	524	7.35	6.63	8.47	1.67	1.59	1.69	33.36	31.75	32.79
Male	15.41	66.8	1.71	1.86	615	8.35	9.03	8.22	1.76	1.73	1.69	37.67	35.46	35.27
Male	16.77	61.1	1.71	1.78	628	8.17	7.2	8.53	1.77	1.75	1.73	31.31	31.35	31.11
Male	17.55	74.1	1.83	1.95	691	6.83	6.96	11.45	1.76	1.76	1.71	26.64	25.87	25.48
Male	16.9	78	1.83	1.97	560	8.41	10.63	6.85	1.68	1.66	1.63	30.62	30.88	31.6
Male	16.36	68.7	1.76	1.82	606	6.93	8.11	5.55	1.67	1.66	1.6	29.26	29.38	28.66
Male	16.68	64.9	1.71	1.69	529	9.28	10.26	9.45	1.67	1.62	1.7	31.5	31.53	31.77
Male	15.94	75.3	1.85	1.94	586	8.52	9.94	7.37	1.61	1.61	1.53	27.02	26.91	26.04
Male	15.93	64.2	1.77	1.82	634	5.54	7.03	7.92	1.67	1.71	1.66	30.53	30.07	30.19
Male	15.14	66.8	1.69	1.69	535	7.41	5.52	6.9	1.62	1.67	1.69	30.04	30.81	29.67
Male	15.28	68.3	1.76	1.78	608	7.96	8.68	6.79	1.63	1.66	1.59	29.72	30.31	30.54
Male	17.05	75.6	1.8	1.83	440	9.02	7.12	12.29	1.61	1.6	1.57
Female	14.65	55		1.57	591	7.31	8.29	14.82	1.42	1.4	1.47	32.14	32.88	34.74
Female	14.04	60.7	1.68	1.69	561	8.46	9.14	8.2	1.46	1.45	1.45	32.89	34.39	30.47
Female	14.71	57.3	1.66	1.71	568	9.96	10.99	12.73	1.4	1.41	1.37	30.39	29.74	30.39
Female	14.28	49.3	1.59	1.67	530	9.21	6.1	7.9	1.42	1.37	1.39	31.69	31.16	31.24
Female	14.57	51.1	1.61	1.64	584	6.1	7.49	5.31	1.4	1.42	1.39	33.75	34.31	33.14
Female	14.64	49	1.54	1.63	611	9.31	6.58	6.83	1.45	1.35	1.38	34.46	35	35.38
Female	14.54	57.1	1.59	1.58	547	6.18	5.31	6.09	1.32	1.3	1.31	37.04	36.75	32.6
Female	14.52	49.7	1.56	1.73	616	6.53	6.1	5.79	1.47	1.41	1.45	29.81	31.49	29.51
Female	14.3	58.7	1.59	1.64	518	8.25	5.8	6.41	1.48	1.48	1.5	33.75	34.44	32.94
Female	16.1	64.7	1.73	1.74	752	10.18	8.3	8.07	1.46	1.45	1.38	29.29	29.38	29.16
Female	16.3	65.3	1.73	1.79	752	9.5	5.22	10.1	1.65	1.58	1.59	32.3	31.75	31.73
Female	16.98	67.7	1.69	1.59	686	7.13	5.79	9.54	1.49	1.48	1.49	31.5	31.53	31.77
Female	14.67	53.7	1.56	1.66	546	11.98	8.29	7.52	1.37	1.41	1.34	32.52	32.52	31.84
Female	14.14	50.5	1.53	1.63	551	6.69	7.26	7.68	1.27	1.27	1.23	31.45	31.87	31.94
Female	17.35	58.5	1.71	1.8	531	6.69	7.52	6.66	1.43	1.44	1.45	28.17	27.27	28.02
dv – intra-cycle variation of the horizontal speed of displacement. ηF – Froude efficiency
1st – first stroke cycle measured; 2nd – second stroke cycle measured; 3rd – third stroke cycle measured.
